# Supplementary material for: Analysis and Quantification of Alkyl (C12-22) Trimethyl Ammonium Chloride Content in Cosmetics: Regulatory Compliance Gap Analysis
Source: MDPI journal article supplement (doi:10.3390/cosmetics8040103), 2021-11-03
Supplement: s1 [file s1]

Article

# Analysis and Quantification of Alkyl (C12-22) Trimethyl Ammonium Chloride Content in Cosmetics: Regulatory Compliance Gap Analysis

Ammar Abdulrahman Jairoun, Sabaa Saleh Al-Hemyari, Moyad Shahwan and Sa'ed H. Zyoud

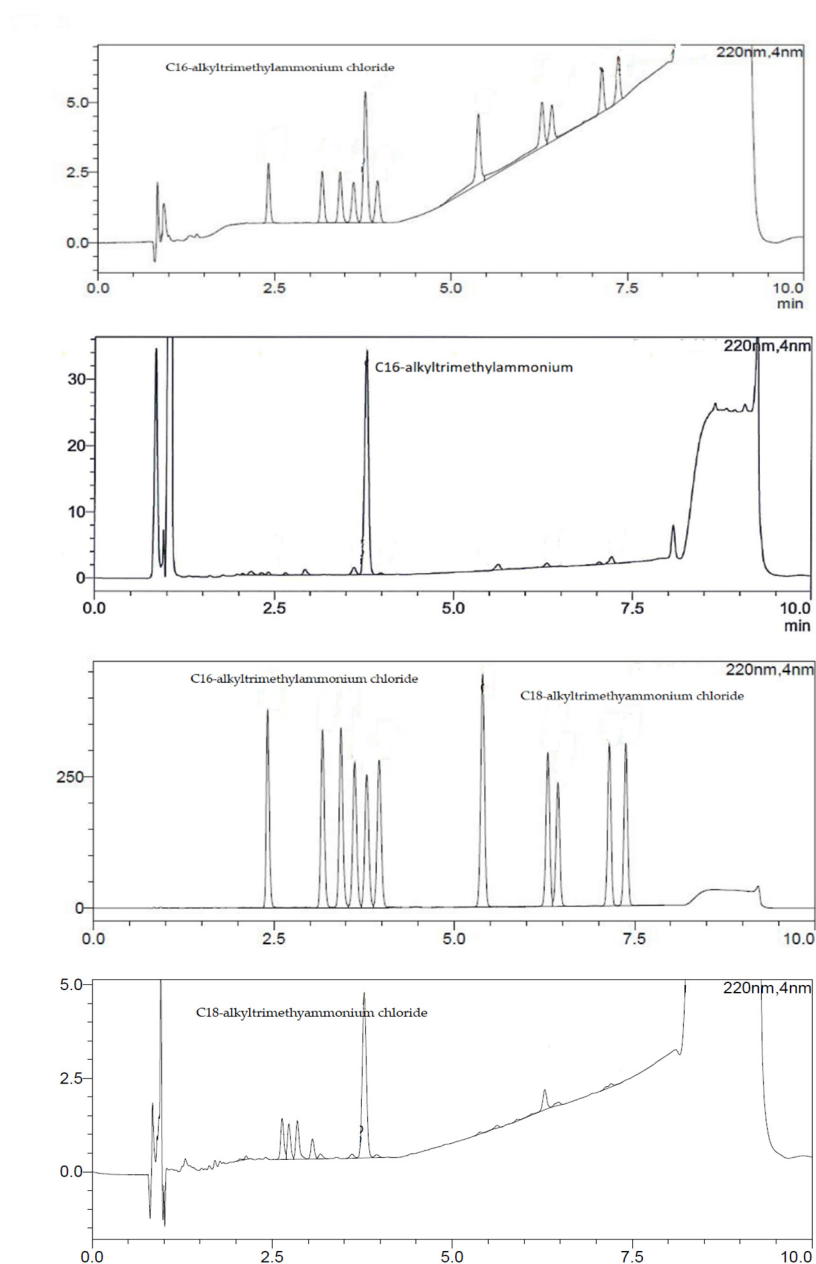

Figure S1. Chromatograms for some analyzed cosmetics and personal care products.
